# Supplementary material for: Electrodegradation of 2,4-dichlorophenoxyacetic acid herbicide from aqueous solution using three-dimensional electrode reactor with G/β-PbO2anode: Taguchi optimization and degradation mechanism determination
Source: Royal Society of Chemistry journal article supplement (doi:10.1039/c8ra08471h), 2018-01-01
Supplement: c8ra08471h1.pdf [file c8ra08471h1.pdf]

## **Supplementary data**

**Electrodegradation of 2,4-Dichlorophenoxyacetic acid from aqueous solution using three- dimensional electrode reactor with G/ $\beta$ -PbO<sub>2</sub> anode: Taguchi Optimization and degradation mechanism determination**

## **Chemicals**

In this study, 2,4-Dichlorophenoxyacetic acid (2,4-D, chemical formula:  $C_8H_6Cl_2O_3$ , 99% purity), Lead nitrate ( $Pb(NO_3)_2$ , >99% purity), nitric acid ( $HNO_3$ , 95% purity), Granular activated carbon (GACs) and Sodium Sulfate ( $Na_2SO_4$ , 99% purity) were supplied from Sigma Aldrich (St. Louis, MO, USA). In addition, NaOH and HCl were purchased from Merck CO (Darmstadt, Germany). Double distilled water was applied to prepare the solution. 1N HCl and NaOH were applied to adjust the pH solution.

## **Preparation of the G/ $\beta$ - $PbO_2$ electrode**

To prepare the G/ $\beta$ - $PbO_2$ , the graphite electrodes ( $7.0 \times 5.8 \times 0.5$  cm) were used. At the first, the soft sandpaper was utilized to polish the surface of the electrode. Then, it was truly washed by distilled water. The G/ $\beta$ - $PbO_2$  electrode was prepared through the electrochemical deposition on graphite. Initially, the graphite was sonicated with 40% NaOH solution and 1:1 (V/V)  $HNO_3/H_2SO_4$  for 20 min. After that, the graphite was washed with deionized water and it was transferred to an electrochemical deposition cell containing 0.5 M  $Pb(NO_3)_2$  in 0.1 M  $HNO_3$  solution. The electrochemical deposition of  $PbO_2$  on graphite was performed under the current density of 5 mA/cm<sup>2</sup> for 180-240 min. All of the experiments were carried out at 25 °C temperature (17,18).

## **Optimum Concentration of the Supporting Electrolyte (SE) Dose**

The electrolyte has an important role in enhancing the solution conductivity and accelerating the electron transfer and, consequently, it can lead to increase the performance of the electrochemical reaction. Thus, it is necessary to determine the SE dose to advance the ionic strength, especially for the solutions without enough conductivity (18)). The optimum SE dose, to offer the studied current density (3-9 mA/cm<sup>2</sup>), was determined by dissolving the concentrations of sodium sulfate ( $Na_2SO_4$ ) (0.4-1.5 gr/250 cc) in 250 cc 2,4-D herbicide solution and the corresponding potential was then evaluated after applying the currents.

Table. S1: Controllable factors and their levels.

| <b>Factor</b> | <b>Description</b>                    | <b>Level 1</b> | <b>Level 2</b> | <b>Level 3</b> | <b>Level 4</b> |
|---------------|---------------------------------------|----------------|----------------|----------------|----------------|
| <b>A</b>      | pH                                    | 3              | 5              | 7              | 10             |
| <b>B</b>      | Electrolysis time (min)               | 30             | 50             | 80             | 100            |
| <b>C</b>      | 2,4-D concentration (mg/L)            | 50             | 100            | 150            | 200            |
| <b>D</b>      | Current density (mA/cm <sup>2</sup> ) | 3              | 5              | 7              | 9              |

Table. S2. Supporting electrolyte (SE) dose providing desired currents and the corresponding potentials

| <b>Na<sub>2</sub>SO<sub>4</sub> dose<br/>(gr/250 cc)</b> | <b>Current<br/>(A)</b> | <b>Voltage (V)</b> |           |
|----------------------------------------------------------|------------------------|--------------------|-----------|
|                                                          |                        | <b>2D</b>          | <b>3D</b> |
| <b>0.4</b>                                               | 0.27                   | 9.5                | 10.1      |
|                                                          | 0.45                   | 13.8               | 14.6      |
|                                                          | 0.63                   | 17.9               | 19.1      |
|                                                          | 0.81                   | 22.5               | 23.5      |
| <b>0.5</b>                                               | 0.27                   | 7.9                | 9.4       |
|                                                          | 0.45                   | 11.1               | 12.4      |
|                                                          | 0.63                   | 15.3               | 16.2      |
|                                                          | 0.81                   | 18.5               | 19.9      |
| <b>0.8</b>                                               | 0.27                   | 6.7                | 8.7       |
|                                                          | 0.45                   | 8.6                | 9.8       |
|                                                          | 0.63                   | 11.4               | 12.3      |
|                                                          | 0.81                   | 13.5               | 14.9      |
| <b>1</b>                                                 | 0.27                   | 5.9                | 7         |
|                                                          | 0.45                   | 7.8                | 8.6       |
|                                                          | 0.63                   | 9.2                | 10.9      |
|                                                          | 0.81                   | 12.5               | 13.1      |
| <b>1.2</b>                                               | 0.27                   | 5.1                | 6         |
|                                                          | 0.45                   | 6.5                | 7.9       |
|                                                          | 0.63                   | 8.7                | 9.8       |
|                                                          | 0.81                   | 10.9               | 11.7      |
| <b>1.5</b>                                               | 0.27                   | 4.8                | 5.5       |
|                                                          | 0.45                   | 6.2                | 7.1       |
|                                                          | 0.63                   | 7.5                | 8.6       |
|                                                          | 0.81                   | 8.9                | 10.2      |

Table. S3. The kinetics for the electrochemical degradation of 2,4-D and removal of COD  
(time: 100 min, pH: 5, Na<sub>2</sub>SO<sub>4</sub>: 1gr/ 250 cc and *j*: 9 mA/cm<sup>2</sup>)

| Electrochemical process | k (min <sup>-1</sup> ) |        | R <sup>2</sup> |       | t <sub>1/2</sub> (min) |      |
|-------------------------|------------------------|--------|----------------|-------|------------------------|------|
|                         | 2,4-D                  | COD    | 2,4-D          | COD   | 2,4-D                  | COD  |
| <b>2D EC</b>            | 0.0119                 | 0.0101 | 0.935          | 0.911 | 58.2                   | 69.4 |
| <b>3D EC</b>            | 0.0228                 | 0.0187 | 0.988          | 0.975 | 31.5                   | 37.3 |

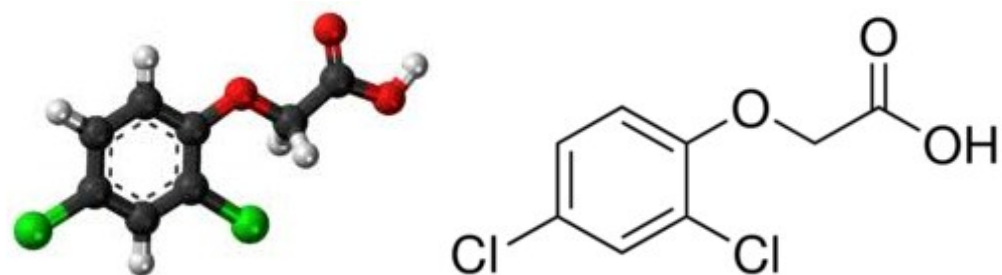

Fig. S1. Chemical structures of 2,4-Dichlorophenoxyacetic acid herbicide

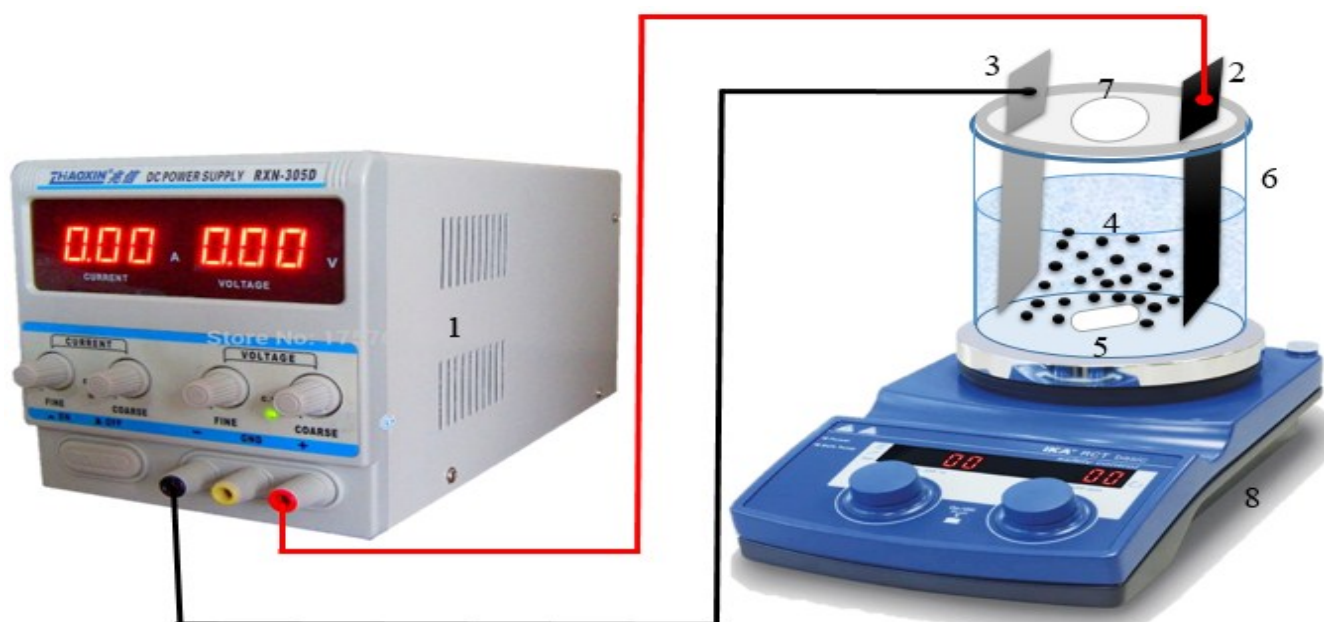

Fig. S2. The batch electrochemical reactor, 1. DC Power supply, 2. Anode electrode ( $G/\beta\text{-PbO}_2$ ), 3. Cathode electrode (SS316), 4. Simulated 2,4-D solution (including GACs), 5. Magnetic- bar stirrer, 6. Electrochemical cell, 7. Sampling port and 8. Magnetic stirrer controlled

(a)

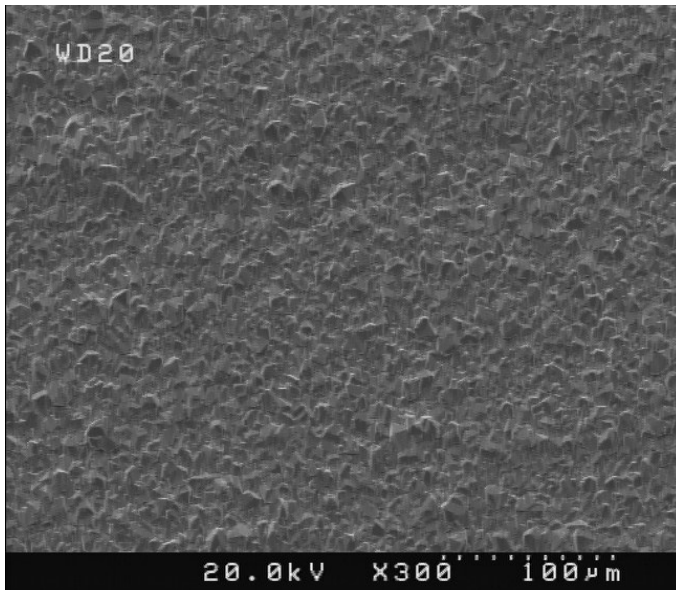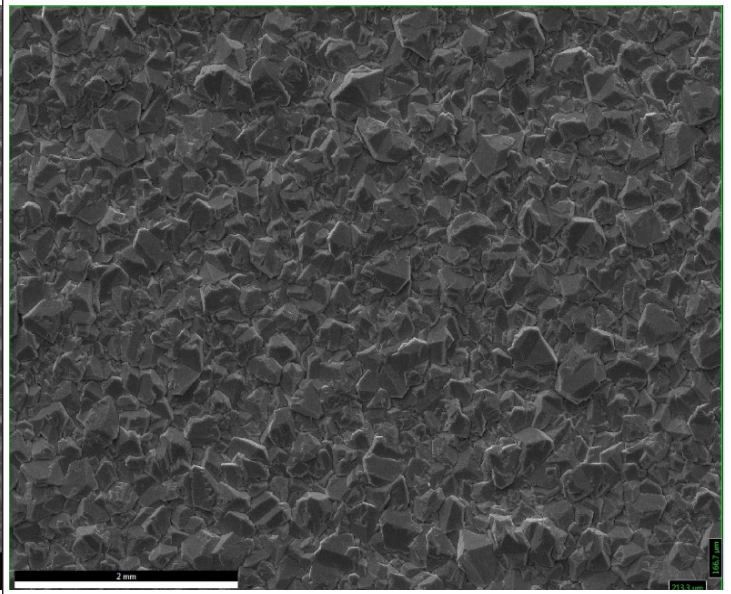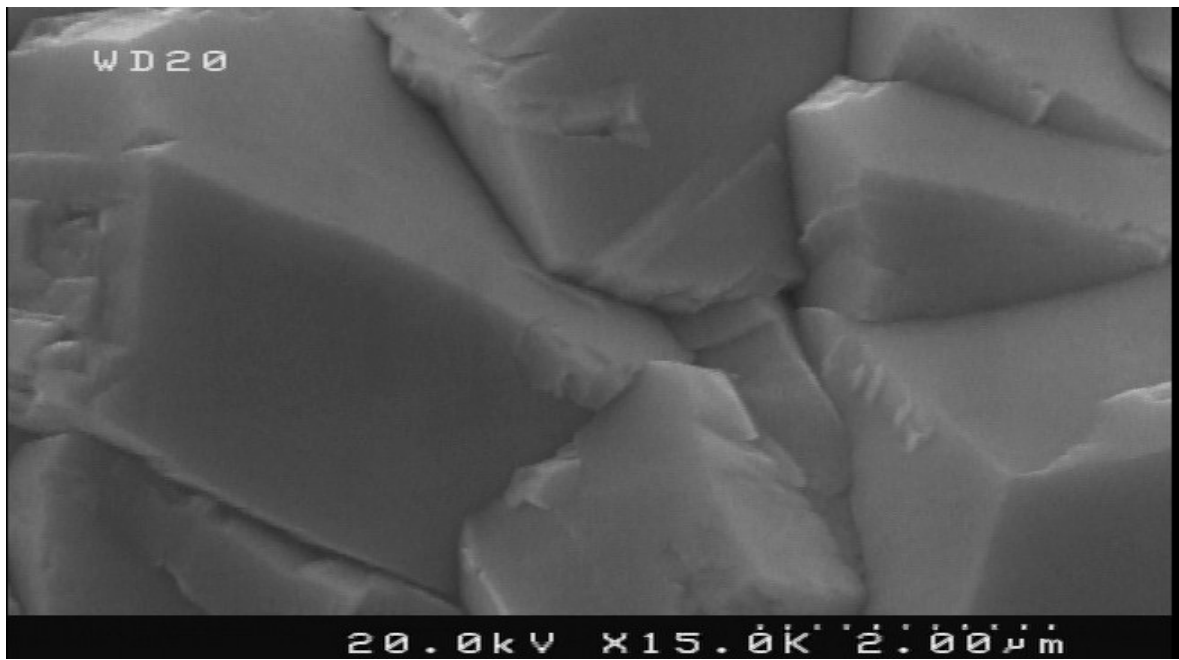

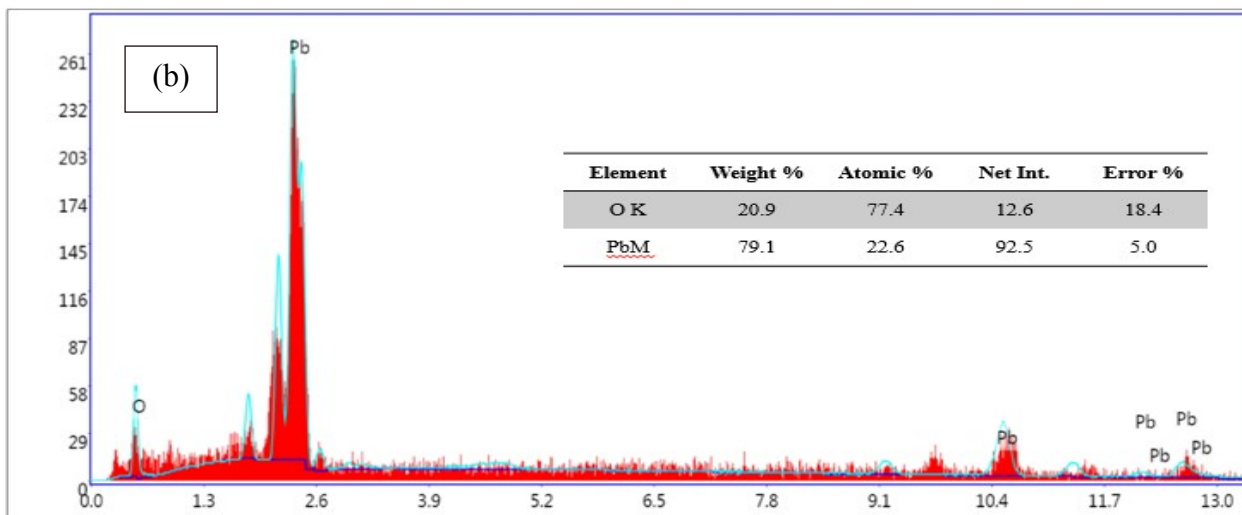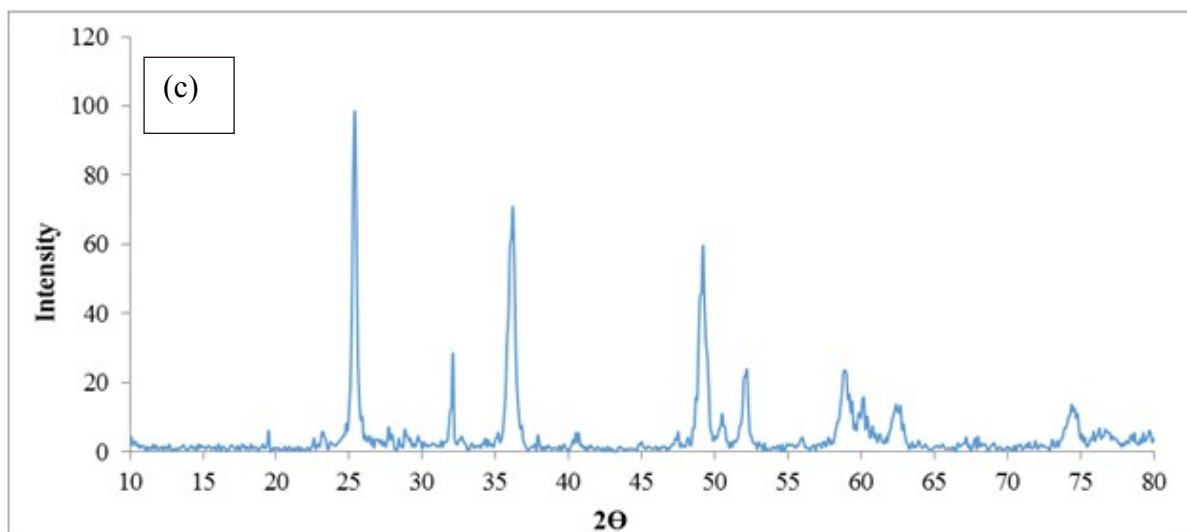

**Fig. S3.** (a) SEM micrographs of the surface of G/ $\beta$ -PbO<sub>2</sub> at different magnifications; (b) EDX analysis of G/ $\beta$ -PbO<sub>2</sub> anode; (c) XRD analysis of G/ $\beta$ -PbO<sub>2</sub> anode.

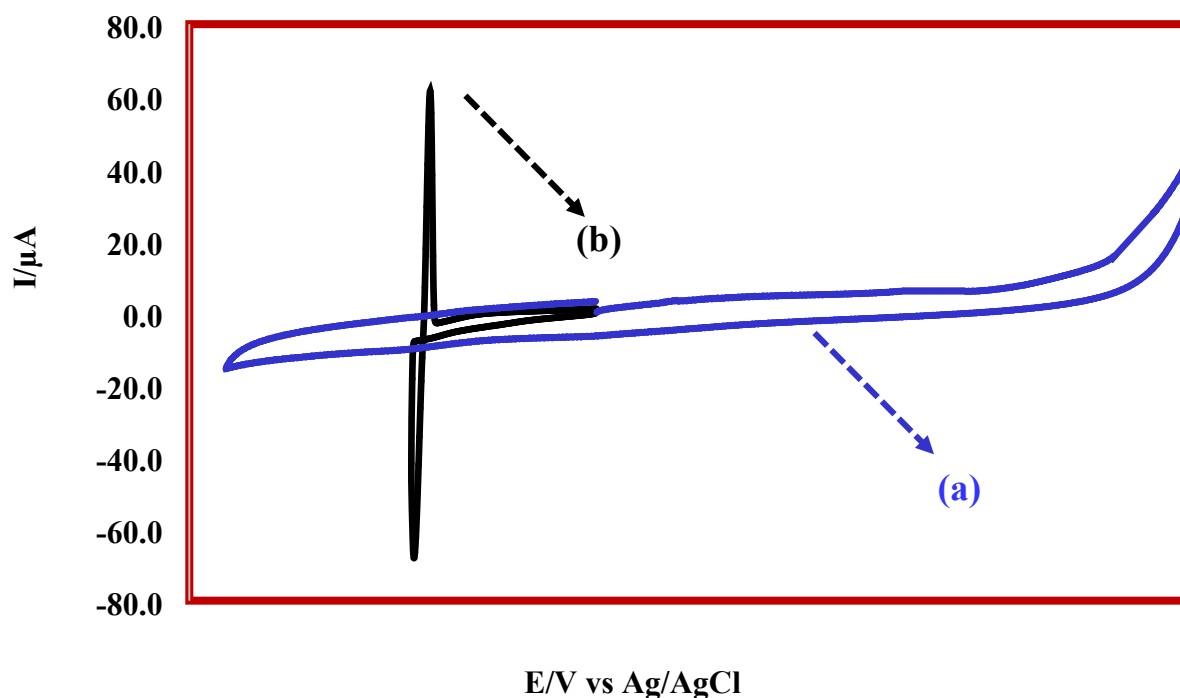

**Fig. S4.** Cyclic voltammogram of the electrolyzed solution containing 2,4-D herbicide +  $\text{Na}_2\text{SO}_4$ . (a) before spiked with  $\text{Pb}(\text{NO}_3)_2$  and (b) after spiked with  $\text{Pb}(\text{NO}_3)_2$  ( $1.5 \times 10^{-6} \text{ M}$ ), at glassy carbon electrode, in aqueous solution,  $\text{pH} = 5.0$ . Scan rate:  $100 \text{ mV/s}$  at room temperature.
